# Supplementary material for: A Fast and Robust Third-Order Multivariate Calibration Approach Coupled with Excitation–Emission Matrix Phosphorescence for the Quantification and Oxidation Kinetic Study of Fluorene in Wastewater Samples
Source: MDPI journal article supplement (doi:10.3390/chemosensors11010053), 2023-01-07
Supplement: s1 [file s1]

# A Fast and Robust Third-Order Multivariate Calibration Approach Coupled with Excitation–Emission Matrix Phosphorescence for the Quantification and Oxidation Kinetic Study of Fluorene in Wastewater Samples

Xiang-Dong Qing <sup>1,\*</sup>, Xiao-Hua Zhang <sup>2</sup>, Rong An <sup>1</sup>, Jin Zhang <sup>1</sup>, Ling Xu <sup>1</sup> and Ludovic Duponchel <sup>3,\*</sup>

- <sup>1</sup> Hunan Provincial Key Laboratory of Dark Tea and Jin-hua, College of Materials and Chemical Engineering, Hunan City University, Yiyang 413000, China; anrong@hncu.edu.cn (R.A.); tcddzdc@163.com (J.Z.); xuling@hncu.edu.cn (L.X.)
- <sup>2</sup> Key Laboratory of Biomarker Based Rapid-Detection Technology for Food Safety of Henan Province, Food and Bioengineering College, Xuchang University, Xuchang 461000, China; xhzhang12016020@xcu.edu.cn
- <sup>3</sup> Université Lille 1, CNRS, UMR 8516–LASIRE–Laboratoire de Spectroscopie Pour Les Interactions, La Réactivité et l'environnement, Lille F-59000, France
- \* Correspondence: xdqing123@hnu.edu.cn (X.-D.Q.); ludovic.duponchel@univ-lille.fr (L.D.)

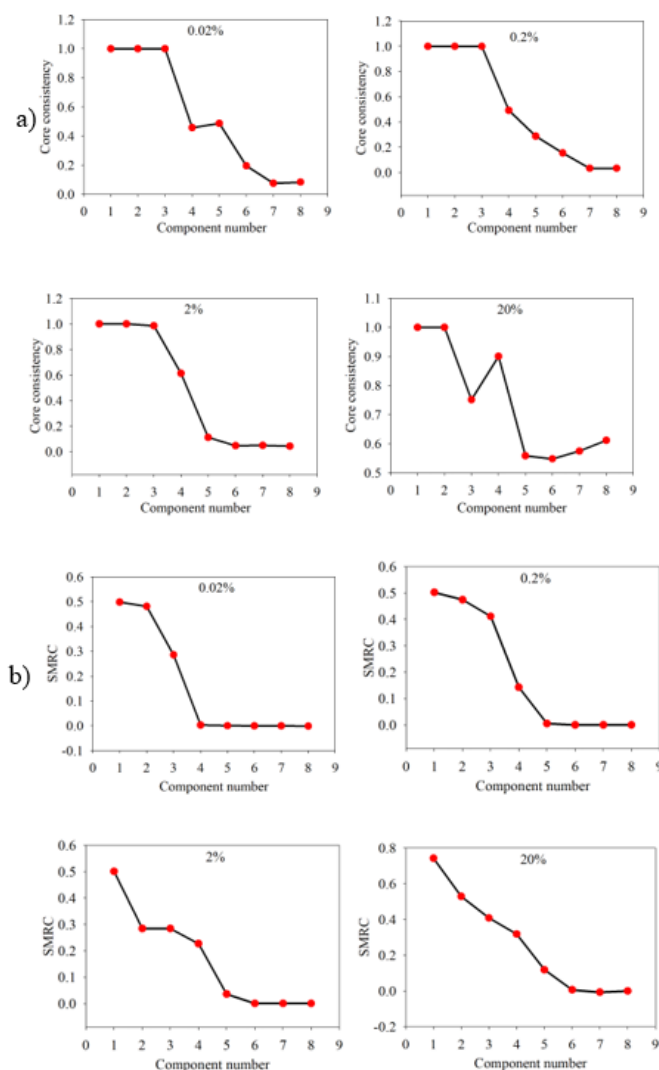

**Figure S1.** The results of 8 components for the simulated data with different homoscedastic noise levels using different methods, (a) CORCONDIA, (b) AWQLD-MCS. SMRC is the abbreviation of Sorted Mean Relative Concentration.

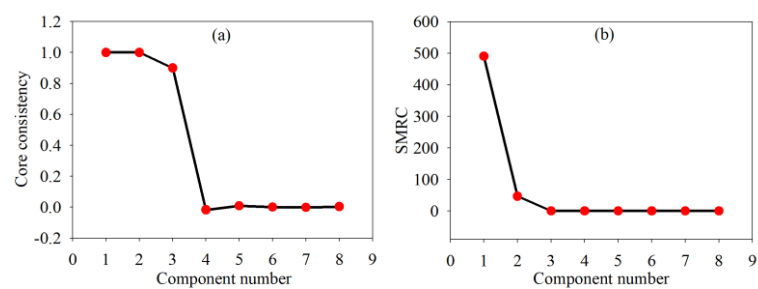

**Figure S2.** The results of 8 components for the first real four-way phosphorescence data using different methods, (a) CORCONDIA, (b) AWQLD-MCS.

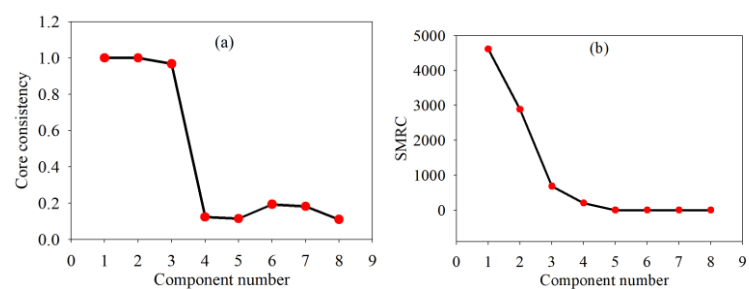

**Figure S3.** The results of 8 components for the second real four-way phosphorescence data using different methods, (a) CORCONDIA, (b) AWQLD-MCS.

**Table S1.** The convergence property of PARAFAC, AQLD and SWAQLD for simulated excitation-emission-kinetic four-way phosphorescence data with four levels of heteroscedastic noise.

| <i>Noise<sub>heter</sub></i> (%) | Iteration number (computation time (s)) |                            |                      |        |         |         |         |           |          |
|----------------------------------|-----------------------------------------|----------------------------|----------------------|--------|---------|---------|---------|-----------|----------|
|                                  | PARAFAC                                 |                            |                      | AQLD   |         |         | SWAQLD  |           |          |
|                                  | Min                                     | Max                        | Average <sup>a</sup> | Min    | Max     | Average | Min     | Max       | Average  |
| 0.02                             | 266(313.4)                              | 2053(2411.0)               | 385(453.3)           | 5(0.4) | 12(1.0) | 6(0.5)  | 60(3.8) | 212(14.0) | 102(6.9) |
| 0.2                              | 226(321.8)                              | 2108(3024.7)               | 352(557.4)           | 5(0.4) | 10(0.9) | 6(0.5)  | 59(3.7) | 194(13.4) | 89(6.2)  |
| 2                                | 182(227.4)                              | 877(1423.4)                | 279(399.0)           | 5(0.4) | 11(0.8) | 6(0.5)  | 47(4.2) | 174(12.2) | 75(5.7)  |
| 20                               | 151(180.1)                              | 3000 <sup>b</sup> (3583.0) | 725.5(866.3)         | 5(0.4) | 14(1.0) | 6(0.5)  | 40(2.7) | 159(11.3) | 60(4.4)  |

<sup>a</sup> These values are average results for 100 runs with random initialization.

<sup>b</sup> PARAFAC did not converge within 3000 iterations for one time out of 100 runs (1/100).

**Table S2.** The influence of heteroscedastic noise levels on correlation coefficients, root-mean-square errors of prediction (RMSEPs) and *k* values predicted by PARAFAC, AQLD and SWAQLD, respectively, for simulated four-way data.

| <i>Modes</i> |                                 | PARAFAC             |        |        |        | AQLD   |        |        |        | SWAQLD |        |        |        |
|--------------|---------------------------------|---------------------|--------|--------|--------|--------|--------|--------|--------|--------|--------|--------|--------|
|              |                                 | 0.02%               | 0.2%   | 2%     | 20%    | 0.02%  | 0.2%   | 2%     | 20%    | 0.02%  | 0.2%   | 2%     | 20%    |
| A            | a <sub>1</sub>                  | 1.0000 <sup>a</sup> | 1.0000 | 1.0000 | 1.0000 | 1.0000 | 1.0000 | 1.0000 | 1.0000 | 1.0000 | 1.0000 | 1.0000 | 1.0000 |
|              | a <sub>2</sub>                  | 1.0000              | 1.0000 | 1.0000 | 1.0000 | 1.0000 | 1.0000 | 1.0000 | 1.0000 | 1.0000 | 1.0000 | 1.0000 | 1.0000 |
|              | a <sub>3</sub>                  | 1.0000              | 1.0000 | 1.0000 | 1.0000 | 1.0000 | 1.0000 | 1.0000 | 1.0000 | 1.0000 | 1.0000 | 1.0000 | 1.0000 |
| B            | b <sub>1</sub>                  | 1.0000              | 1.0000 | 1.0000 | 1.0000 | 1.0000 | 1.0000 | 1.0000 | 1.0000 | 1.0000 | 1.0000 | 1.0000 | 1.0000 |
|              | b <sub>2</sub>                  | 1.0000              | 1.0000 | 1.0000 | 1.0000 | 1.0000 | 1.0000 | 1.0000 | 1.0000 | 1.0000 | 1.0000 | 1.0000 | 1.0000 |
|              | b <sub>3</sub>                  | 1.0000              | 1.0000 | 1.0000 | 1.0000 | 1.0000 | 1.0000 | 1.0000 | 1.0000 | 1.0000 | 1.0000 | 1.0000 | 1.0000 |
| C            | c <sub>1</sub>                  | 1.0000              | 1.0000 | 1.0000 | 1.0000 | 1.0000 | 1.0000 | 1.0000 | 1.0000 | 1.0000 | 1.0000 | 1.0000 | 1.0000 |
|              | c <sub>2</sub>                  | 1.0000              | 1.0000 | 1.0000 | 1.0000 | 1.0000 | 1.0000 | 1.0000 | 1.0000 | 1.0000 | 1.0000 | 1.0000 | 1.0000 |
|              | c <sub>3</sub>                  | 1.0000              | 1.0000 | 1.0000 | 1.0000 | 1.0000 | 1.0000 | 1.0000 | 1.0000 | 1.0000 | 1.0000 | 1.0000 | 1.0000 |
| D            | d <sub>1</sub>                  | 1.0000              | 1.0000 | 1.0000 | 1.0000 | 1.0000 | 1.0000 | 1.0000 | 1.0000 | 1.0000 | 1.0000 | 1.0000 | 1.0000 |
|              | d <sub>2</sub>                  | 1.0000              | 1.0000 | 1.0000 | 1.0000 | 1.0000 | 1.0000 | 1.0000 | 1.0000 | 1.0000 | 1.0000 | 1.0000 | 1.0000 |
|              | d <sub>3</sub>                  | 1.0000              | 1.0000 | 1.0000 | 1.0000 | 1.0000 | 1.0000 | 1.0000 | 1.0000 | 1.0000 | 1.0000 | 1.0000 | 1.0000 |
| RMSEP        | Analyte 1                       | 0.0000              | 0.0000 | 0.0000 | 0.0000 | 0.0000 | 0.0000 | 0.0000 | 0.0000 | 0.0000 | 0.0000 | 0.0000 | 0.0000 |
|              | Analyte 2                       | 0.0000              | 0.0000 | 0.0000 | 0.0000 | 0.0000 | 0.0000 | 0.0000 | 0.0000 | 0.0000 | 0.0000 | 0.0000 | 0.0000 |
|              | Predicted <i>k</i> <sup>b</sup> | 0.1000              | 0.1000 | 0.1000 | 0.1000 | 0.1000 | 0.1000 | 0.1000 | 0.1000 | 0.1000 | 0.1000 | 0.1000 | 0.1000 |

<sup>a</sup> All values in the first 12 rows of this table correspond to the correlation coefficient between the profiles predicted by the different methods and the reference profiles.

<sup>b</sup> The chosen constant rate of the analyte in the simulated data set is 0.1000.

**Table S3.** The influence of factor numbers ( $N$ ) on correlation coefficients, RMSEPs and  $k$  values predicted by PARAFAC, AQLD and SWAQLD, respectively, for simulated four-way data with  $\alpha_{\text{homo}} = 2\%$ .

| Mode     |                | PARAFAC |        |               | AQLD   |        |        | SWAQLD |        |        |
|----------|----------------|---------|--------|---------------|--------|--------|--------|--------|--------|--------|
|          |                | $N=4$   | $N=5$  | $N=10$        | $N=4$  | $N=5$  | $N=10$ | $N=4$  | $N=5$  | $N=10$ |
| <b>A</b> | a <sub>1</sub> | 1.0000  | 1.0000 | 0.9833        | 1.0000 | 1.0000 | 1.0000 | 1.0000 | 1.0000 | 1.0000 |
|          | a <sub>2</sub> | 1.0000  | 1.0000 | 0.9979        | 1.0000 | 1.0000 | 1.0000 | 1.0000 | 1.0000 | 1.0000 |
|          | a <sub>3</sub> | 1.0000  | 0.9999 | 0.9999        | 1.0000 | 1.0000 | 1.0000 | 1.0000 | 1.0000 | 1.0000 |
| <b>B</b> | b <sub>1</sub> | 1.0000  | 1.0000 | 0.9930        | 1.0000 | 1.0000 | 1.0000 | 1.0000 | 1.0000 | 1.0000 |
|          | b <sub>2</sub> | 1.0000  | 1.0000 | 1.0000        | 1.0000 | 1.0000 | 1.0000 | 1.0000 | 1.0000 | 1.0000 |
|          | b <sub>3</sub> | 1.0000  | 1.0000 | 0.9881        | 1.0000 | 1.0000 | 1.0000 | 1.0000 | 1.0000 | 1.0000 |
| <b>C</b> | c <sub>1</sub> | 1.0000  | 1.0000 | 0.9984        | 1.0000 | 1.0000 | 1.0000 | 1.0000 | 1.0000 | 1.0000 |
|          | c <sub>2</sub> | 1.0000  | 1.0000 | 1.0000        | 1.0000 | 1.0000 | 1.0000 | 1.0000 | 1.0000 | 1.0000 |
|          | c <sub>3</sub> | 1.0000  | 1.0000 | 0.9998        | 1.0000 | 1.0000 | 1.0000 | 1.0000 | 1.0000 | 1.0000 |
| <b>D</b> | d <sub>1</sub> | 1.0000  | 1.0000 | 0.9841        | 1.0000 | 1.0000 | 1.0000 | 1.0000 | 1.0000 | 1.0000 |
|          | d <sub>2</sub> | 1.0000  | 1.0000 | 1.0000        | 1.0000 | 1.0000 | 1.0000 | 1.0000 | 1.0000 | 1.0000 |
|          | d <sub>3</sub> | 1.0000  | 1.0000 | 0.9996        | 1.0000 | 1.0000 | 1.0000 | 1.0000 | 1.0000 | 1.0000 |
| RMSE     | Analyte 1      | 0.0005  | 0.0005 | <b>0.1001</b> | 0.0007 | 0.0007 | 0.0007 | 0.0006 | 0.0006 | 0.0006 |
| P        | Analyte 2      | 0.0006  | 0.0007 | <b>0.0037</b> | 0.0010 | 0.0009 | 0.0011 | 0.0003 | 0.0005 | 0.0007 |
|          | Predicted $k$  | 0.1005  | 0.1002 | <b>0.1884</b> | 0.0940 | 0.0951 | 0.0943 | 0.1000 | 0.1000 | 0.1000 |

**Table S4.** The influence of factor numbers ( $N$ ) on correlation coefficients, RMSEPs and  $k$  values predicted by PARAFAC, AQLD and SWAQLD, respectively, for simulated four-way data with  $\sigma_{\text{heter}} = 0.02\%$ .

| Mode          |           | PARAFAC |        |               | AQLD   |        |        | SWAQLD |        |        |
|---------------|-----------|---------|--------|---------------|--------|--------|--------|--------|--------|--------|
|               |           | $N=3$   | $N=4$  | $N=10$        | $N=3$  | $N=4$  | $N=10$ | $N=3$  | $N=4$  | $N=10$ |
| <b>A</b>      | $a_1$     | 1.0000  | 1.0000 | 0.9999        | 1.0000 | 1.0000 | 1.0000 | 1.0000 | 1.0000 | 1.0000 |
|               | $a_2$     | 1.0000  | 1.0000 | 0.9968        | 1.0000 | 1.0000 | 1.0000 | 1.0000 | 1.0000 | 1.0000 |
|               | $a_3$     | 1.0000  | 1.0000 | 1.0000        | 1.0000 | 1.0000 | 1.0000 | 1.0000 | 1.0000 | 1.0000 |
| <b>B</b>      | $b_1$     | 1.0000  | 1.0000 | 0.9626        | 1.0000 | 1.0000 | 1.0000 | 1.0000 | 1.0000 | 1.0000 |
|               | $b_2$     | 1.0000  | 1.0000 | 0.9986        | 1.0000 | 1.0000 | 1.0000 | 1.0000 | 1.0000 | 1.0000 |
|               | $b_3$     | 1.0000  | 1.0000 | 1.0000        | 1.0000 | 1.0000 | 1.0000 | 1.0000 | 1.0000 | 1.0000 |
| <b>C</b>      | $c_1$     | 1.0000  | 1.0000 | 0.9999        | 1.0000 | 1.0000 | 1.0000 | 1.0000 | 1.0000 | 1.0000 |
|               | $c_2$     | 1.0000  | 1.0000 | 1.0000        | 1.0000 | 1.0000 | 1.0000 | 1.0000 | 1.0000 | 1.0000 |
|               | $c_3$     | 1.0000  | 1.0000 | 0.9995        | 1.0000 | 1.0000 | 1.0000 | 1.0000 | 1.0000 | 1.0000 |
| <b>D</b>      | $d_1$     | 1.0000  | 1.0000 | 0.9677        | 1.0000 | 1.0000 | 1.0000 | 1.0000 | 1.0000 | 1.0000 |
|               | $d_2$     | 1.0000  | 1.0000 | 0.9130        | 1.0000 | 1.0000 | 1.0000 | 1.0000 | 1.0000 | 1.0000 |
|               | $d_3$     | 1.0000  | 1.0000 | 1.0000        | 1.0000 | 1.0000 | 1.0000 | 1.0000 | 1.0000 | 1.0000 |
| RMSEP         | Analyte 1 | 0.0000  | 0.0000 | <b>0.1444</b> | 0.0000 | 0.0000 | 0.0000 | 0.0000 | 0.0000 | 0.0000 |
|               | Analyte 2 | 0.0000  | 0.0000 | <b>0.2029</b> | 0.0000 | 0.0000 | 0.0000 | 0.0000 | 0.0000 | 0.0000 |
| Predicted $k$ |           | 0.1000  | 0.1000 | <b>0.1703</b> | 0.1000 | 0.1000 | 0.1000 | 0.1000 | 0.1000 | 0.1000 |
